# Supplementary material for: The Global Transmission and Control of Influenza
Source: PLOS journal article supplement (doi:10.1371/journal.pone.0019515), 2011-05-06
Supplement: S12 (10.1371/journal.pone.0019515.s012) [file journal.pone.0019515.s012]

**Table S1. Model parameters**

| Parameter  | Value    | Description                                                          | Source |
|------------|----------|----------------------------------------------------------------------|--------|
| $VE_S$     | 0.4      | Reduction in susceptibility from vaccination                         | [1]    |
| $VE_I$     | 0.4      | Reduction in infectiousness from vaccination                         | [1]    |
| $VE_P$     | 0.667    | Reduction in becoming symptomatic upon infection from vaccination    | [1]    |
| $\tau$     | 28 days  | Time for a vaccine to reach full efficacy                            |        |
| $R_0$      | 1.4–1.85 | Basic reproductive number in-season                                  |        |
| $R_{min}$  | 0.8      | Reproductive number out-of-season                                    |        |
| $m$        | 0.5      | ratio of asymptomatic to symptomatic infectiousness                  |        |
| $p_{symp}$ | 0.67     | probability of becoming symptomatic given infection                  | [2]    |
| sympRatio  | 0.25     | Ratio of travel probability of travel of symptomatic to asymptomatic |        |
| $v_i$      |          | Relative infectiousness on day $i$                                   | [3–4]  |

[1] Basta NE, Halloran ME, Matrajt L, Longini IM Jr (2008) Estimating influenza vaccine efficacy from challenge and community-based study data. *Am J Epidemiol* 168: 1343–52.

[2] Carrat F, Vergu E, Ferguson NM, Lemaître M, Cauchemez S, et al. (2008) Time lines of infection and disease in human influenza: a review of volunteer challenge studies. *Am J Epidemiol* 167: 775–85. [3] Murphy BR, Rennels MB, Douglas RG Jr, Betts RF, Couch RB, et al. (1980) Evaluation of influenza A/Hong Kong/123/77 (H1N1) ts-1A2 and cold-adapted recombinant viruses in seronegative adult volunteers. *Infect Immun* 29:348–55.

[4] Baccam P, Beauchemin C, Macken CA, Hayden FG, Perelson AS (2006) Kinetics of influenza A virus infection in humans. *J Virol* 80: 7590–9.
