# Supplementary material for: The Global Transmission and Control of Influenza
Source: PLOS journal article supplement (doi:10.1371/journal.pone.0019515), 2011-05-06
Supplement: S13 (10.1371/journal.pone.0019515.s013) [file journal.pone.0019515.s013]

**Table S2. Influenza season data from the literature.**

| Country or city                      | Season                                                      | References |
|--------------------------------------|-------------------------------------------------------------|------------|
| <i>temperate northern hemisphere</i> |                                                             |            |
| Canada                               | mid-September to early June                                 | [1]        |
| Japan                                | November–April                                              | [2, 3]     |
| South Korea                          | January–April                                               | [2]        |
| South Korea                          | November–February                                           | [3]        |
| Iran                                 | Oct–April, peak in Feb                                      | [4]        |
| Saudi Arabia                         | begins in Sept, peaks in Nov–Dec                            | [5]        |
| <i>temperate southern hemisphere</i> |                                                             |            |
| Australia                            | April–Oct                                                   | [2, 3]     |
| <i>tropics and other regions</i>     |                                                             |            |
| China                                | winter peak in N, summer (but year-round) in S              | [6]        |
| Northern China                       | November–February peak                                      | [3]        |
| Shanghai, China                      | July–September, may have smaller peak in March              | [2]        |
| Guangdong, China                     | March–October                                               | [2]        |
| Hong Kong, China                     | April–August, may have smaller peak in March                | [2]        |
| Hong Kong                            | January–March, July–August (small peak), year-round         | [7]        |
| Hong Kong                            | April, year-round                                           | [8]        |
| Taiwan                               | December–March, year-round                                  | [9]        |
| Mongolia                             | November–March                                              | [3]        |
| Pune, India                          | June–September                                              | [10, 3]    |
| Delhi, India                         | September–March, activity throughout the year               | [3]        |
| Kolkata, India                       | May–September                                               | [11]       |
| Bangladesh                           | May–September                                               | [12]       |
| Pakistan                             | July–October peak                                           | [2]        |
| Thailand                             | May–October, activity all year                              | [2]        |
| Malaysia                             | April–June, activity all year                               | [2]        |
| Singapore                            | March–July, smaller peak in Oct–Jan, activity all year      | [2, 3]     |
| Hanoi, Vietnam                       | peak in June–August, year-round                             | [13]       |
| Cambodia                             | June–December                                               | [14, 15]   |
| Philippines                          | June–September, smaller peak in Dec–Jan                     | [3]        |
| Indonesia                            | December–January peak                                       | [16]       |
| Papua New Guinea                     | Jul–Sept peak, year-round                                   | [2]        |
| New Zealand                          | April–September                                             | [2, 3]     |
| Fiji                                 | March–April, July–September, usually a single wave per year | [2]        |
| Brazil                               | varies by latitude                                          | [17]       |
| Fortaleza, Brazil                    | Jan–July                                                    | [18]       |
| Bogotá, Colombia                     | September–November, year-round                              | [19]       |
| Chile                                | May–August                                                  | [2]        |
| Panama                               | May–August                                                  | [2]        |
| Nicaragua                            | June–July, October–December                                 | [20]       |
| Dakar, Senegal                       | June–September                                              | [21]       |
| Kenya                                | year-round, more in colder months                           | [22]       |
| Cameroon                             | year-round, Oct–Nov peak                                    | [23]       |

## References

- [1] Schanzer DL, Langley JM, Dummer T, Viboud C, Tam TWS (2010) A composite epidemic curve for seasonal influenza in Canada with an international comparison. *Influenza Other Respi Viruses* 4: 295-306.
- [2] Reichhelder PS, Kendal AP, Shortridge KF, Hampson A (1989) Influenza surveillance in the Pacific basin: seasonability of virus occurrence. In: Chan YC, Doraisingham S, Ling AE, editors, *Proceedings of First Asia-Pacific Congress of Medical Virology*. World Scientific, p. 41244.
- [3] Hampson AW (1999) Epidemiological data on influenza in Asian countries. *Vaccine* 17 Suppl 1: S19-23.
- [4] Mokhtari-Azad T, Mohammadi H, Moosavi IA, Saadatmand Z, Nategh R (2004) Influenza surveillance in the Islamic Republic of Iran from 1991 to 2001. *East Mediterr Health J* 10: 315-21.
- [5] al Hajjar S, Akhter J, al Jumaah S, Hussain Qadri SM (1998) Respiratory viruses in children attending a major referral centre in Saudi Arabia. *Ann Trop Paediatr* 18: 87-92.
- [6] Shu YL, Fang LQ, de Vlas SJ, Gao Y, Richardus JH, et al. (2010) Dual seasonal patterns for influenza, China. *Emerg Infect Dis* 16: 725-6.
- [7] Li C, Choi B, Wong T (2006) Influenza-related deaths and hospitalizations in Hong Kong: A subtropical area. *Public Health* 120: 517 - 524.
- [8] Fitzner KA, McGhee SM, Hedley AJ, Shortridge KF (1999) Influenza surveillance in Hong Kong: results of a trial physician sentinel programme. *Hong Kong Med J* 5: 87-94.
- [9] Hsieh YC, Chen HY, Yen JJ, Liu DP, Chang LY, et al. (2005) Influenza in Taiwan: seasonality and vaccine strain match. *J Microbiol Immunol Infect* 38: 238-43.
- [10] Rao BL, Banerjee K (1993) Influenza surveillance in Pune, India, 1978–90. *Bulletin of the World Health Organization* 71: 177–181.
- [11] Agrawal AS, Sarkar M, Chakrabarti S, Rajendran K, Kaur H, et al. (2009) Comparative evaluation of real-time PCR and conventional RT-PCR during a 2 year surveillance for influenza and respiratory syncytial virus among children with acute respiratory infections in Kolkata, India, reveals a distinct seasonality of infection. *J Med Microbiol* 58(Pt 12): 1616-22.
- [12] Zaman RU, Alamgir ASM, Rahman M, Azziz-Baumgartner E, Gurley ES, et al. (2009) Influenza in outpatient ILI case-patients in national hospital-based surveillance, Bangladesh, 2007–2008. *PLoS One* 4: e8452.
- [13] Nguyen HLK, Saito R, Nghiem HK, Nishikawa M, Shobugawa Y, et al. (2007) Epidemiology of influenza in Hanoi, Vietnam, from 2001 to 2003. *J Infect* 55: 58-63.

- [14] Mardy S, Ly S, Heng S, Vong S, Huch C, et al. (2009) Influenza activity in Cambodia during 2006–2008. *BMC Infect Dis* 9: 168.
- [15] Blair PJ, Wierzba TF, Touch S, Vonthanak S, Xu X, et al. (2010) Influenza epidemiology and characterization of influenza viruses in patients seeking treatment for acute fever in Cambodia. *Epidemiol Infect* 138: 199-209.
- [16] Beckett CG, Kosasih H, Ma'roef C, Listiyaningsih E, Elyazar IRF, et al. (2004) Influenza surveillance in Indonesia: 1999–2003. *Clinical Infectious Diseases* 39: 443-449.
- [17] Alonso WJ, Viboud C, Simonsen L, Hirano EW, Daufenbach LZ, et al. (2007) Seasonality of influenza in Brazil: a traveling wave from the Amazon to the subtropics. *Am J Epidemiol* 165: 1434-42.
- [18] Moura FE, Perdigao ACB, Siqueira MM (2009) Seasonality of influenza in the tropics: a distinct pattern in northeastern Brazil. *Am J Trop Med Hyg* 81: 180-3.
- [19] Ramírez AP, Mendoza AR, Montoya JM, Cotes K, López JD, et al. (2009) Mortalidad asociada con las temporadas de mayor circulación de los virus de la influenza en Bogotá, Colombia, 1997-2005 [Mortality associated with peak seasons of influenza virus circulation in Bogotá, Colombia, 1997–2005]. *Rev Panam Salud Publica* 26: 435-9.
- [20] Gordon A, Ortega O, Kuan G, Reingold A, Saborio S, et al. (2009) Prevalence and seasonality of influenza-like illness in children, Nicaragua, 2005–2007. *Emerg Infect Dis* 15: 408-14.
- [21] Dosseh A, Ndiaye K, Spiegel A, Sagna M, Mathiot C (2000) Epidemiological and virological influenza survey in Dakar, Senegal: 1996–1998. *Am J Trop Med Hyg* 62: 639-43.
- [22] Gachara G, Ngeranwa J, Magana JM, Simwa JM, Wango PW, et al. (2006) Influenza virus strains in Nairobi, Kenya. *J Clin Virol* 35: 117-8.
- [23] Tchidjou HK, Vescio F, Boros S, Guemkam G, Minka E, et al. (2010) Seasonal pattern of hospitalization from acute respiratory infections in Yaoundé, Cameroon. *J Trop Pediatr* 56: 317-20.
