# Supplementary material for: The Global Transmission and Control of Influenza
Source: PLOS journal article supplement (doi:10.1371/journal.pone.0019515), 2011-05-06
Supplement: S15 (10.1371/journal.pone.0019515.s015) [file journal.pone.0019515.s015]

**Table S4. Observed and simulated pandemic H1N1 2009 epidemic peaks.**

| <b>Country</b>           | <b>Observed (week)<sup>1</sup></b> | <b>Observed (date of mid-week)<sup>1</sup></b> | <b>Best-fit model peak</b> |
|--------------------------|------------------------------------|------------------------------------------------|----------------------------|
| Argentina                | 27                                 | 7/8                                            | 6/29                       |
| Australia                | 30                                 | 7/29                                           | 7/12                       |
| Canada                   | 45                                 | 11/11                                          | 11/23                      |
| Chile                    | 28                                 | 7/15                                           | 6/27                       |
| France                   | 48                                 | 12/2                                           | 11/14                      |
| Greece                   | 48                                 | 12/2                                           | 11/17                      |
| Italy                    | 46                                 | 11/18                                          | 11/11                      |
| Japan                    | 44                                 | 11/4                                           | 11/6                       |
| New Zealand              | 28                                 | 7/15                                           | 7/6                        |
| Norway                   | 45                                 | 11/11                                          | 11/10                      |
| Philippines              | 26                                 | 7/1                                            | 7/21                       |
| Romania                  | 48                                 | 12/2                                           | 11/28                      |
| Russia                   | 48                                 | 12/2                                           | 12/4                       |
| South Korea              | 44                                 | 11/4                                           | 11/5                       |
| Turkey                   | 47                                 | 11/25                                          | 11/20                      |
| United States of America | 43                                 | 10/28                                          | 11/23                      |

<sup>1</sup>Observed data was from influenza A virology surveillance data from Flunet.
